# Supplementary material for: Very bright mechanoluminescence and remarkable mechanochromism using a tetraphenylethene derivative with aggregation-induced emission
Source: Royal Society of Chemistry journal article supplement (doi:10.1039/c5sc00466g), 2015-01-01
Supplement: c5sc00466g1.pdf [file c5sc00466g1.pdf]

*Electronic Supplementary Information*

## **Highly bright mechanoluminescence and remarkable mechanochromism based on a tetraphenylethene derivative with aggregation-induced emission**

Bingjia Xu,<sup>‡1,2</sup> Jiajun He,<sup>‡1</sup> Yingxiao Mu,<sup>1</sup> Qiangzhong Zhu,<sup>2</sup> Sikai Wu,<sup>1</sup> Yifan Wang,<sup>3</sup> Yi Zhang,<sup>\*1</sup> Chongjun Jin,<sup>2</sup> Changcheng Lo,<sup>3</sup> Zhenguo Chi,<sup>\*1</sup> Alan Lien,<sup>4</sup> Siwei Liu,<sup>1</sup> and Jiarui Xu<sup>\*1</sup>

<sup>a</sup> PCFM Lab, GD HPPC Lab, Guangdong Engineering Technology Research Center for High-performance Organic and Polymer Photoelectric Functional Films, State Key Laboratory of Optoelectronic Material and Technologies, School of Chemistry and Chemical Engineering, Sun Yet-sen University, Guangzhou 510275, China.

E-mail: ceszy@mail.sysu.edu.cn; chizhg@mail.sysu.edu.cn; xjr@mail.sysu.edu.cn; Fax: +86 20 84112222; Tel: +86 20 84112712.

<sup>b</sup> State Key Laboratory of Optoelectronic Material and Technologies, School of Physics and Engineering, Sun Yat-sen University, Guangzhou 510275, China

<sup>c</sup> Shenzhen China Star Optoelectronics Technology Co., Ltd, Guangdong, China

<sup>d</sup> TCL Corporate Research, Guangdong, China

### **Table of Contents**

#### **1. General experimental procedures**

Materials

Characterization

#### **2. Synthesis**

Scheme S1. The synthetic route of P<sub>4</sub>TA.

#### **3. Figures and Tables**

Fig. S1 UV and PL spectra of P<sub>4</sub>TA in dichloromethane solution (0.1 mM).

Fig. S2 Fluorescence images of P<sub>4</sub>TA in solid state under the illumination of 365 nm UV light.

Table S1. Single crystal information and ML activity of P<sub>4</sub>TA in different polymorphs.

Fig. S3 Stacking mode and intermolecular interactions of the molecules in SC<sub>b</sub> polymorph.

Fig. S4 Stacking mode and intermolecular interactions of the molecules in SC<sub>g</sub> polymorph.

Table S2. Dihedral angles of the selected planes of P<sub>4</sub>TA in different conformations in single crystals.

Table S3. Summarization of the supramolecular interactions in the two single crystals.

Table S4. Computed vertical transitions and their oscillator strengths and conformations.

Fig. S5 Solid state UV-Visible spectra of C<sub>g</sub> and C<sub>b</sub>.

Fig. S6 PL and ML spectra of P<sub>4</sub>TA in different phases.

#### **4. Structure Information**

Fig. S7 <sup>1</sup>H NMR spectrum of P<sub>4</sub>TA.

Fig. S8 <sup>13</sup>C NMR spectrum of P<sub>4</sub>TA.

Fig. S9 EI-MS of P<sub>4</sub>TA.

Fig. S10 HRMS of P<sub>4</sub>TA.

Fig. S11 FT-IR spectrum of P<sub>4</sub>TA.

Table S5. Crystal data and structure refinement for the two single crystals.

## 1. General experimental procedures

**Materials** 4-Bromobenzophenone, diphenylmethane, *n*-butyllithium (2.2 M, in hexane), tetrakis(triphenylphosphine) palladium(0), Aliquat 336, and 5-formylthiophene-2-boronic acid purchased from Alfa Aesar were used as received. The compound of (2-(4-bromophenyl)ethene-1,1,2-triyl)tribenzene (TPE-Br)<sup>[1]</sup> was synthesized according to the literature method. Ultra-pure water was used in the experiments. All other reagents and solvents were purchased with analytical grade from Guangzhou Dongzheng Company (China) and used without further purification. The water/tetrahydrofuran mixtures with different water fractions were prepared by slowly adding distilled water into the THF solution of the samples under ultrasonic at room temperature.

**Characterization** Proton and carbon NMR (<sup>1</sup>HNMR and <sup>13</sup>CNMR) spectra were measured on a Mercury-Plus 300 spectrometer and a Varian INOVA500NB spectrometer, respectively (CDCl<sub>3</sub>, tetramethylsilane as the internal standard). The mass spectra were measured using Thermo spectrometers (DSQ & MAT95XP-HRMS). The FT-IR spectra were obtained on a Nicolet NEXUS 670 spectrometer (KBr pellet). The UV-visible absorption spectra were determined on a Hitachi U-3900 spectrophotometer. The PL spectra were measured on an Ocean Optics Maya Pro2000 with a 365 nm Ocean Optics LLS-LED as the excitation source. Light was introduced into the detector through an optical fiber. The ML spectra were collected from a spectrometer of Acton SP2750 with a liquid-nitrogen-cooled CCD (SPEC-10, Princeton) as a power detector. The thermal behaviors were determined by DSC at heating and cooling rates of 10 °C/min under N<sub>2</sub> atmosphere using a NETZSCH thermal analyzer (DSC 204F1). Wide-angle XRD measurements were performed at 293 K using a Bruker X-ray diffractometer (D8 ADVANCE, Germany) with an X-ray source of Cu K $\alpha$  ( $\lambda$ = 0.15406 nm) at 40 kV and 40 mA at a scan rate of 4° (2 $\theta$ )/min. The fluorescence quantum yields of solid powders were measured on an integrating sphere (C-701, Labsphere, Inc.) with a 365 nm Ocean Optics LLS-LED as the excitation source. Light was introduced into the integrating sphere using an optical fiber. The quantum chemistry calculation was performed at the B3LYP/6-31G (d, p) level of theory using the DFT method in the Gaussian 09 software.

The single crystals of P<sub>4</sub>TA in SC<sub>b</sub> polymorph were grown from a dilute solution, which was prepared with 5 mg sample and 4 mL CHCl<sub>3</sub>/ethanol (1:3 by volume) as solvent, whereas those of P<sub>4</sub>TA in SC<sub>g</sub> polymorph were obtained from a concentrated solution prepared with 15 mg sample and 4 mL CHCl<sub>3</sub>/ethanol (1:3 by volume) as solvent. The single-crystal X-ray diffraction data for SC<sub>b</sub> were collected from an Agilent Technologies Gemini A Ultra system with Cu-K $\alpha$  radiation ( $\lambda$ =1.54178 Å) at 280(10) K. The corresponding diffraction data for SC<sub>g</sub> were obtained from a Bruker Smart 1000 CCD with Cu-K $\alpha$  radiation ( $\lambda$  =1.54178 Å) at 150(10) K. Both structures were solved using direct methods following the difference Fourier syntheses. All non-hydrogen atoms were anisotropically refined through least-squares on  $F^2$  using the SHELXTL program suite. The anisotropic thermal parameters were assigned to all non-hydrogen atoms. The hydrogen atoms attached to carbon were placed in idealized positions and refined using a riding model to the atom from which they were attached. The pictures of the two structures were produced using Diamond 3.2. CCDC 1037840 and 1037841 contain the supplementary crystallographic data of this paper.

1 Z. Zhao, S. Chen, J. W. Y. Lam, P. Lu, Y. Zhong, K. S. Wong, H. S. Kwok, and B. Z. Tang, *Chem. Commun.*, 2010, 46, 2221.

## 2. Synthesis

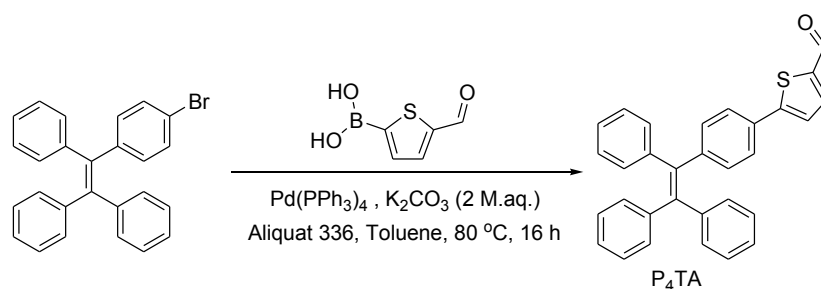

**Scheme S1.** The synthetic route of P<sub>4</sub>TA.

**5-(4-(1,2,2-triphenylvinyl)phenyl)thiophene-2-carbaldehyde (P<sub>4</sub>TA)** TPE-Br (1.20 g, 3.27 mmol) and 5-bromothiophene-2-carbaldehyde (0.75 g, 3.93 mmol) were dissolved in 30 mL toluene. Subsequently, 2 M aqueous K<sub>2</sub>CO<sub>3</sub> solution (5.0 mL) and five drops of Aliquat 336 were added. The mixture was stirred for 40 min under an argon atmosphere at room temperature. The Pd(PPh<sub>3</sub>)<sub>4</sub> catalyst was then added, and the reaction mixture was stirred at 80 °C for 16 h. After cooling to room temperature, the product was concentrated and purified by silica gel column chromatography with dichloromethane/*n*-hexane (*v/v*=1:2). The P<sub>4</sub>TA compound was obtained as a yellow crystalline solid in 41% yield (0.59 g). <sup>1</sup>H NMR (300 MHz, CDCl<sub>3</sub>, 25 °C, TMS)  $\delta$  (ppm): 9.87-9.83 (s, 1 H); 7.73-7.66 (d, 1 H); 7.47-7.37 (d, 2 H); 7.36-7.30 (d, 1 H); 7.20-6.98 (m, 17 H). <sup>13</sup>C NMR (101 MHz, CDCl<sub>3</sub>, 25 °C, TMS)  $\delta$  (ppm): 182.66, 154.20, 145.31, 143.42, 143.30, 142.16, 139.97, 137.34, 132.15, 131.36, 131.32, 131.29, 130.91, 127.92, 127.85, 127.70, 126.81, 126.72, 126.67, 125.65, 123.86. FT-IR (KBr)  $\nu$  (cm<sup>-1</sup>): 3045, 3022, 2846, 1662, 1600, 1450, 1231, 1068, 807, 698. HRMS, *m/z*: [M]<sup>+</sup> 442.1388; calcd. for C<sub>31</sub>H<sub>22</sub>OS 442.1391. Anal. Calc. for C<sub>31</sub>H<sub>22</sub>OS: C 84.13%, H 5.01%, S 7.25%; found: C 82.96%, H 5.14%, S 6.69%.

### 3. Figures and Tables

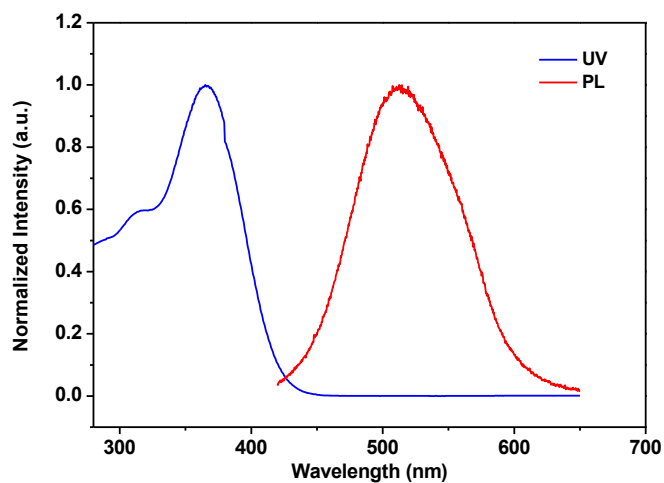

Fig. S1 UV and PL spectra of P<sub>4</sub>TA in dichloromethane solution (0.1 mM).

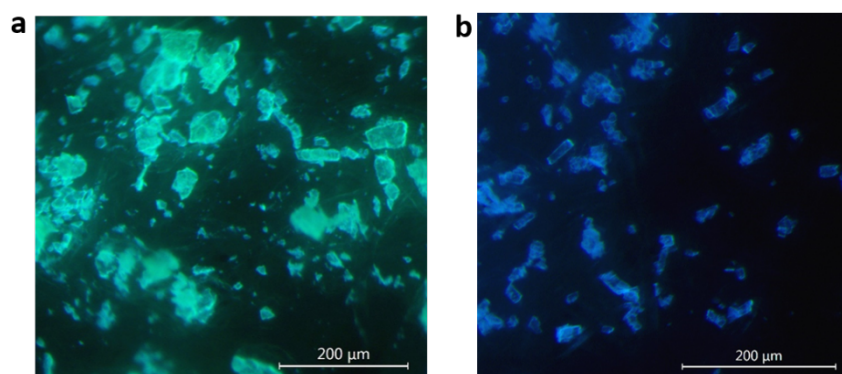

Fig. S2 Fluorescence images of P<sub>4</sub>TA in solid state under the illumination of 365 nm UV light: (a) Crystals of P<sub>4</sub>TA in C<sub>g</sub> phase; (b) Crystals of P<sub>4</sub>TA in C<sub>b</sub> phase.

Table S1. Single crystal information and ML activities of P<sub>4</sub>TA in different polymorphs.

| Compound          | Crystal system               | Space Group | Symmetry     | Polarity          | ML activity |          |
|-------------------|------------------------------|-------------|--------------|-------------------|-------------|----------|
| P <sub>4</sub> TA | SC <sub>b</sub> <sup>a</sup> | Monoclinic  | <i>P2(1)</i> | Noncentrosymmetry | Polar       | inactive |
|                   | SC <sub>g</sub> <sup>b</sup> | Monoclinic  | <i>P2(1)</i> | Noncentrosymmetry | Polar       | active   |

<sup>a</sup>Blue-emitting single crystal of P<sub>4</sub>TA. <sup>b</sup>green-emitting single crystal of P<sub>4</sub>TA.

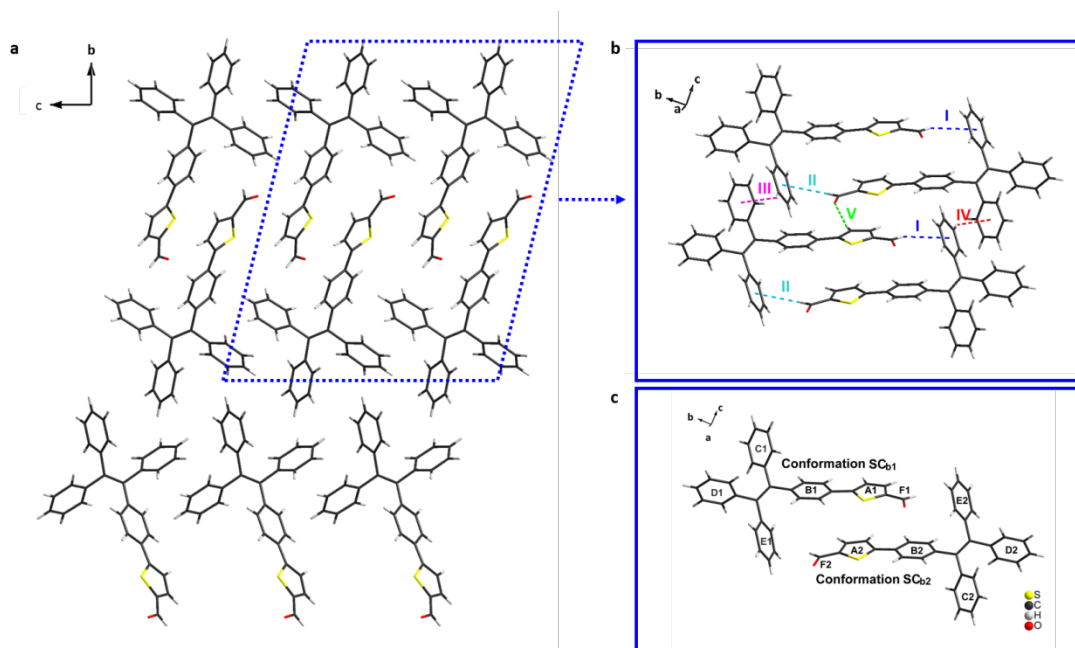

**Fig. S3** Stacking mode and intermolecular interactions of the molecules in  $SC_b$  polymorph: (a) Stacking mode of the molecules of  $P_4TA$  in single crystal structure. (b) Intermolecular interactions of the molecules of  $P_4TA$  in single crystal structure. (c) The two molecular conformations of  $P_4TA$  in single crystal structure.

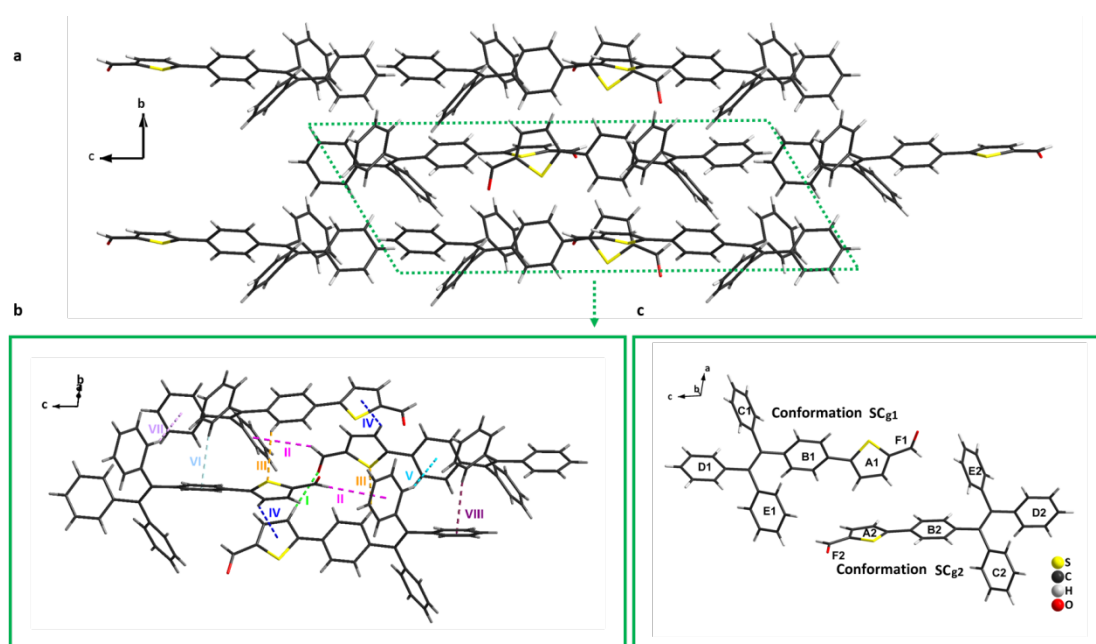

**Fig. S4** Stacking mode and intermolecular interactions of the molecules in  $SC_g$  polymorph: (a) Stacking mode of the molecules of  $P_4TA$  in single crystal structure. (b) Intermolecular interactions of the molecules of  $P_4TA$  in single crystal structure. (c) The two molecular conformations of  $P_4TA$  in single crystal structure.

**Table S2.** Dihedral angles of the selected planes of P<sub>4</sub>TA in different conformations in single crystals.

| Configuration     |                  | $\theta / ^\circ$ <sup>a</sup> |      |      |      |      | A1-A2 |
|-------------------|------------------|--------------------------------|------|------|------|------|-------|
|                   |                  | A-F                            | A-B  | B-C  | C-D  | D-E  |       |
| P <sub>4</sub> TA | SC <sub>b1</sub> | 2.7                            | 2.5  | 74.4 | 62.7 | 87.5 | 3.7   |
|                   | SC <sub>b2</sub> | 2.0                            | 4.7  | 75.1 | 60.3 | 87.3 |       |
|                   | SC <sub>g1</sub> | 6.2                            | 18.9 | 82.4 | 53.3 | 75.8 | 85.8  |
|                   | SC <sub>g2</sub> | 4.4                            | 6.1  | 78.8 | 56.5 | 76.5 |       |

<sup>a</sup> Dihedral angle. The capital letters represent the selected planes of P<sub>4</sub>TA (see Fig. S3c and Fig. S4c). For example, 'A' represents the plane where the thiophene ring of P<sub>4</sub>TA located. 'A1' and 'A2' represent the planes where the thiophene rings in the two molecular conformations of P<sub>4</sub>TA located.

**Table S3.** Summarization of the supramolecular interactions in the two single crystals.

| Single Crystal                    | Orientation of Interaction |                         | d / Å <sup>a</sup> | A / ° <sup>b</sup> |
|-----------------------------------|----------------------------|-------------------------|--------------------|--------------------|
| P <sub>4</sub> TA-SC <sub>b</sub> | I                          | C-H...Ph <sup>[c]</sup> | 3.2752(1)          | 151.120(299)       |
|                                   | II                         | C-H...Ph                | 3.2438(1)          | 140.299(359)       |
|                                   | III                        | C-H...Ph                | 3.0243(1)          | 134.209(324)       |
|                                   | IV                         | C-H...Ph                | 2.8980(1)          | 137.827(301)       |
|                                   | V                          | C-H...O                 | 2.3994(48)         | 154.392(349)       |
| P <sub>4</sub> TA-SC <sub>g</sub> | I                          | C-H...O                 | 2.6600(43)         | 176.933(234)       |
|                                   | II                         | C-H...Ph                | 3.4220(1)          | 147.195(191)       |
|                                   | III                        | C-H...S                 | 2.9359(8)          | 133.951(226)       |
|                                   | IV                         | C-H...TP <sup>[d]</sup> | 2.8797(1)          | 132.312(186)       |
|                                   | V                          | C-H...Ph                | 3.0778(1)          | 156.733(173)       |
|                                   | VI                         | C-H...Ph                | 3.0767(1)          | 155.270(181)       |
|                                   | VII                        | C-H...Ph                | 3.1725(1)          | 155.581(173)       |
|                                   | VIII                       | C-H...Ph                | 3.0005(1)          | 154.751(181)       |

<sup>a</sup> Distance of H...O, H...S, or H...ring interaction. <sup>b</sup> Angel of C-H...O, C-H...S, or C-H...ring interaction. <sup>c</sup> Phenyl ring. <sup>d</sup> Thiophene ring.

**Table S4.** Computed vertical transitions and their oscillator strengths and conformations.

| Conformation     | Oscillator Strength ( <i>f</i> ) | Transition    | Coefficients |
|------------------|----------------------------------|---------------|--------------|
| SC <sub>b1</sub> | 0.5159                           | HOMO→LUMO     | 0.70205      |
|                  | 0.0002                           | HOMO-5→LUMO   | 0.66472      |
|                  |                                  | HOMO-5→LUMO+1 | 0.14761      |
|                  | 0.4089                           | HOMO-1→LUMO   | 0.64280      |
|                  |                                  | HOMO→LUMO+1   | -0.27375     |
|                  | 0.1338                           | HOMO-2→LUMO   | -0.18242     |
|                  |                                  | HOMO-1→LUMO   | 0.23048      |
|                  |                                  | HOMO→LUMO+1   | 0.60242      |
|                  |                                  | HOMO→LUMO+2   | 0.10994      |
| SC <sub>b2</sub> | 0.5159                           | HOMO→LUMO     | 0.70205      |
|                  | 0.0002                           | HOMO-5→LUMO   | 0.66472      |
|                  |                                  | HOMO-5→LUMO+1 | 0.14761      |
|                  | 0.4089                           | HOMO-1→LUMO   | 0.64280      |
|                  |                                  | HOMO→LUMO+1   | -0.27375     |
|                  | 0.1338                           | HOMO-2→LUMO   | -0.18242     |
|                  |                                  | HOMO-1→LUMO   | 0.23048      |
|                  |                                  | HOMO→LUMO+1   | 0.60242      |
|                  |                                  | HOMO→LUMO+2   | 0.10994      |
| SC <sub>g1</sub> | 0.5044                           | HOMO→LUMO     | 0.70263      |
|                  | 0.0002                           | HOMO-5→LUMO   | 0.65460      |
|                  |                                  | HOMO-5→LUMO+1 | 0.19105      |
|                  |                                  | HOMO-5→LUMO+3 | 0.11281      |
|                  | 0.2082                           | HOMO-1→LUMO   | -0.20502     |
|                  |                                  | HOMO→LUMO+1   | 0.66916      |
|                  | 0.2813                           | HOMO-1→LUMO   | 0.64702      |
|                  |                                  | HOMO→LUMO+1   | 0.18935      |
|                  | SC <sub>g2</sub>                 | 0.4343        | HOMO→LUMO    |
| 0.0009           |                                  | HOMO-6→LUMO   | -0.16918     |
|                  |                                  | HOMO-5→LUMO   | 0.63889      |
|                  |                                  | HOMO-5→LUMO+1 | -0.14698     |
|                  |                                  | HOMO-5→LUMO+3 | 0.10489      |
| 0.3352           |                                  | HOMO-1→LUMO   | 0.29121      |
|                  |                                  | HOMO→LUMO+1   | 0.63678      |
| 0.3059           |                                  | HOMO-1→LUMO   | 0.62980      |
|                  |                                  | HOMO→LUMO+1   | -0.23318     |

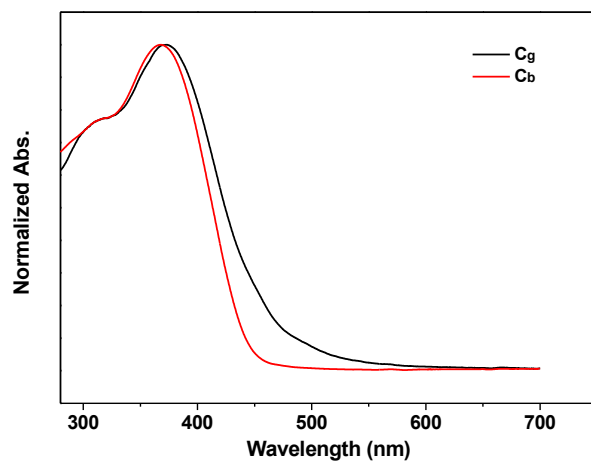

**Fig. S5** Solid state UV-Visible spectra of  $C_g$  and  $C_b$ .

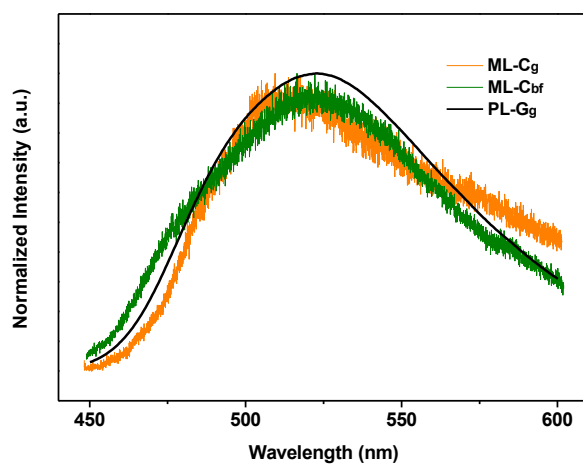

**Fig. S6** PL and ML spectra of  $P_4TA$  in different phases: (ML- $C_g$ ) ML spectrum of the as-prepared green-light crystals; (ML- $C_{bf}$ ) ML spectrum of the fumed sample from blue-light crystals in dichloromethane vapors for 10 min; (PL- $G_g$ ) PL spectrum of the ground sample from green-light crystals.



#### 4. Structure Information

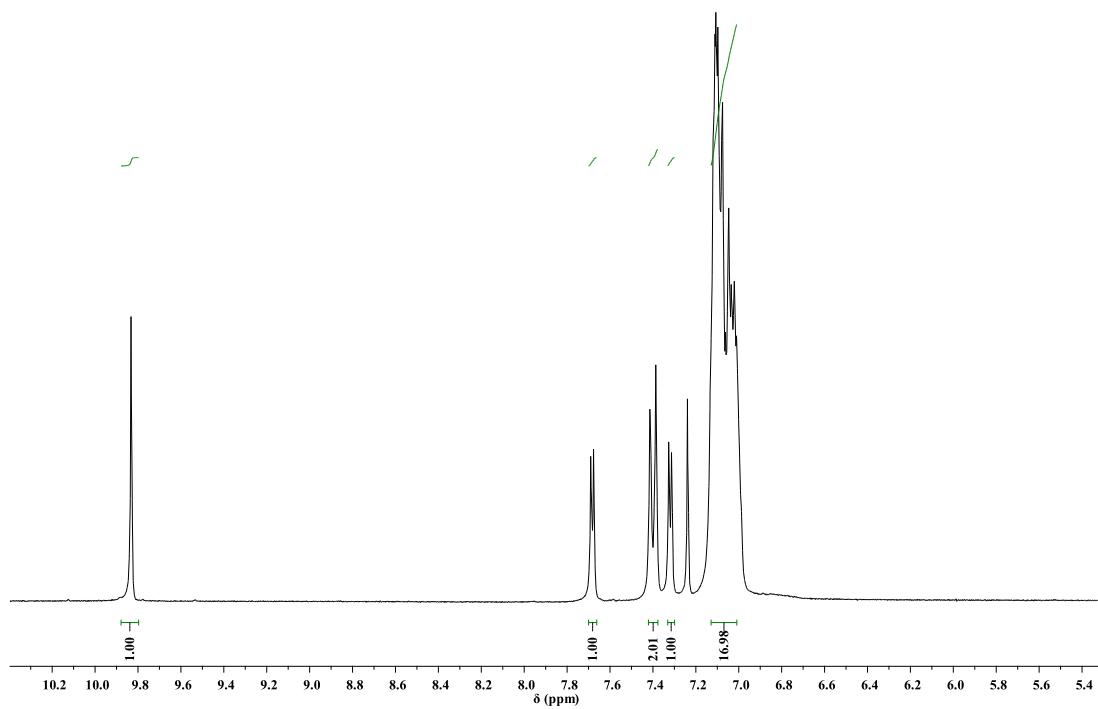

Fig. S7  $^1\text{H}$  NMR spectrum of  $\text{P}_4\text{TA}$ .

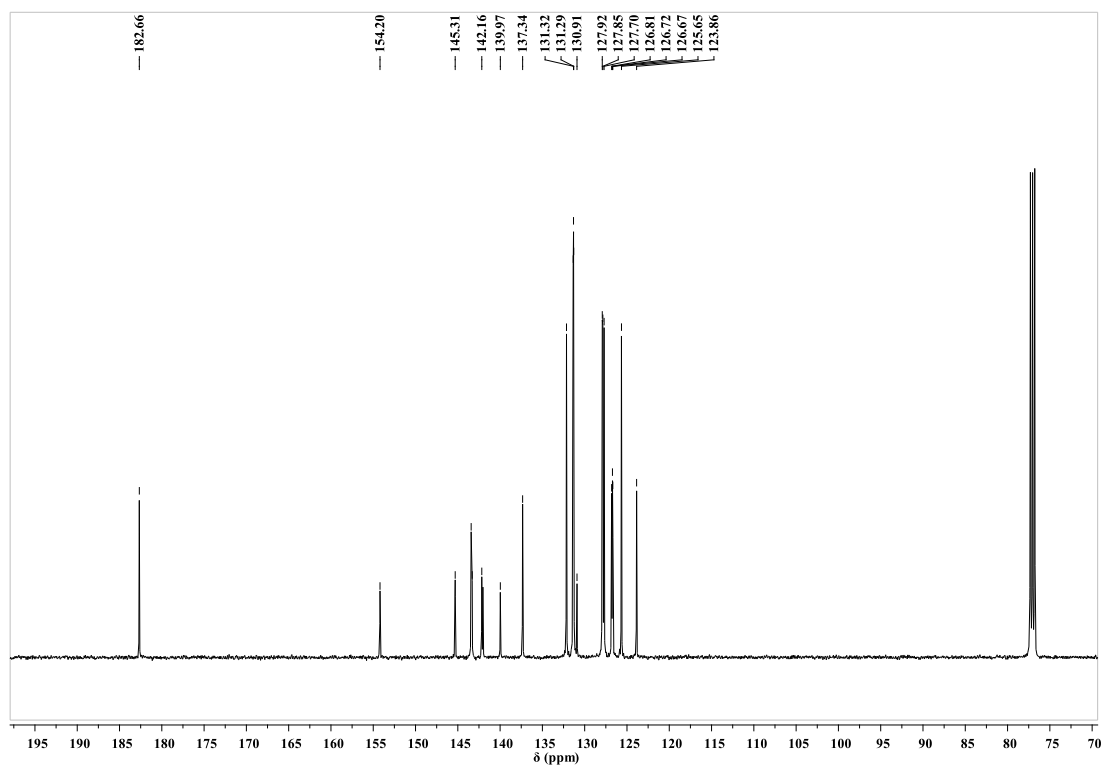

Fig. S8  $^{13}\text{C}$  NMR spectrum of  $\text{P}_4\text{TA}$ .

031314 #184 RT: 2.04 AV: 1 NL: 2.70E4  
T: + c Full ms [45.00-550.00]

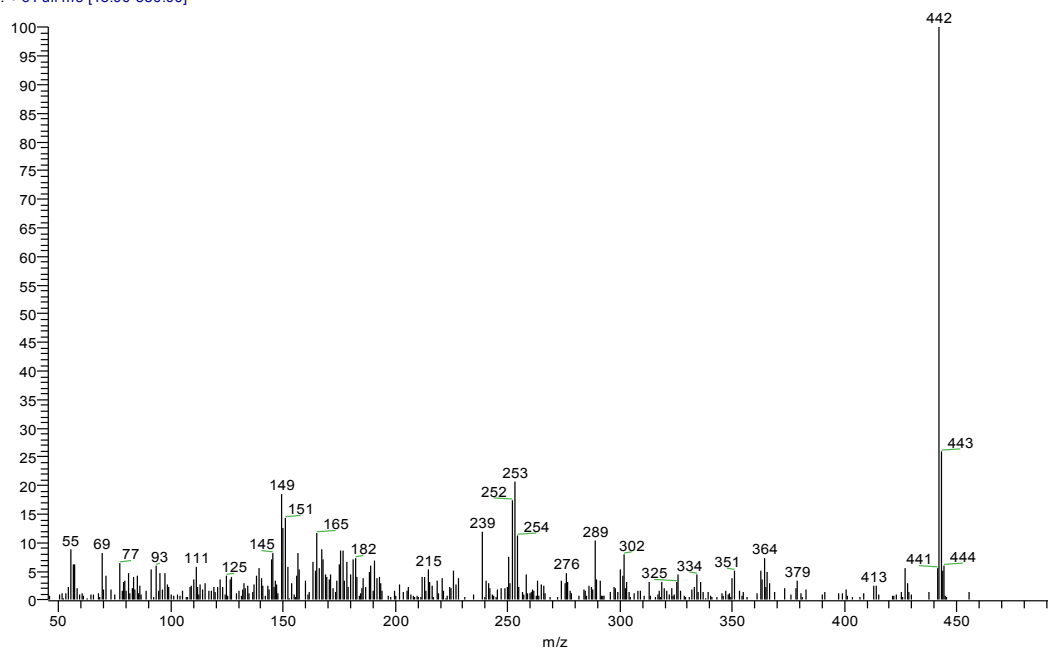

**Fig. S9** EI-MS of P<sub>4</sub>TA.

030501-eta-c1 #11 RT: 0.43 AV: 1 NL: 8.49E4  
T: + c EI Full ms [428.50-445.50]

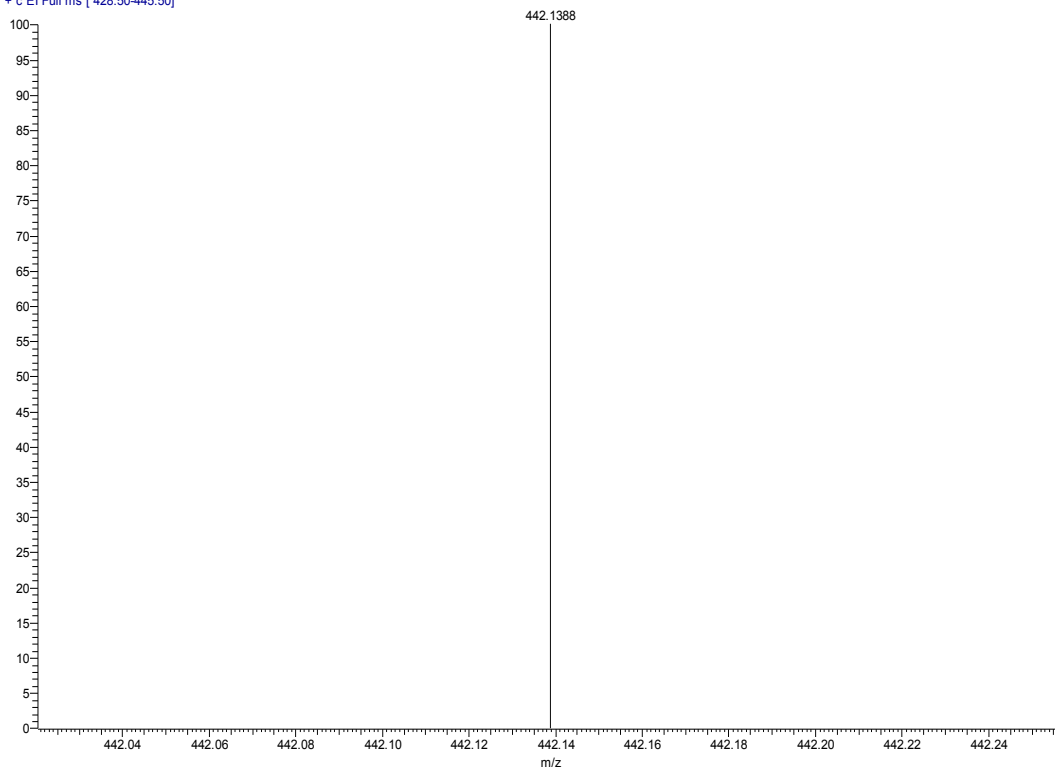

**Fig. S10** HRMS of P<sub>4</sub>TA.

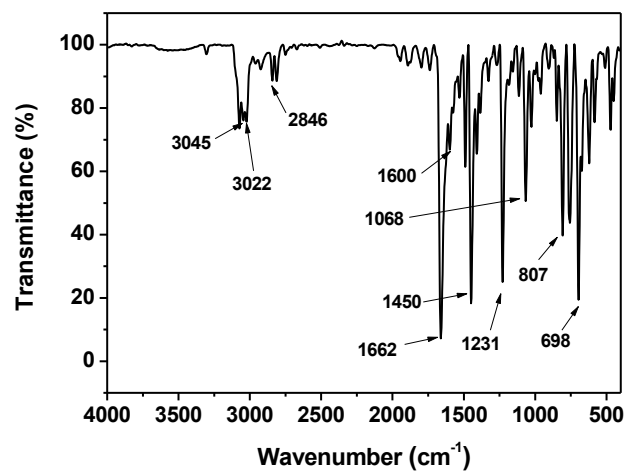

Fig. S11 FT-IR spectrum of P<sub>4</sub>TA.

**Table S5.** Crystal data and structure refinement for the two single crystals.

| Polymorph                                                                                                    | SC <sub>b</sub>                     | SC <sub>g</sub>                     |
|--------------------------------------------------------------------------------------------------------------|-------------------------------------|-------------------------------------|
| formula                                                                                                      | C <sub>31</sub> H <sub>22</sub> OS  | C <sub>31</sub> H <sub>22</sub> OS  |
| fw                                                                                                           | 442.55                              | 442.55                              |
| crystal system,                                                                                              | monoclinic                          | monoclinic                          |
| <i>T</i> / K                                                                                                 | 280(10)                             | 150(10)                             |
| space group                                                                                                  | <i>P2(1)</i>                        | <i>P2(1)</i>                        |
| <i>a</i> /Å                                                                                                  | 5.5940(16)                          | 9.8662(3)                           |
| <i>b</i> /Å                                                                                                  | 47.166(11)                          | 9.3673(2)                           |
| <i>c</i> /Å                                                                                                  | 9.2545(3)                           | 25.568(7)                           |
| $\alpha$ /°                                                                                                  | 90                                  | 90                                  |
| $\beta$ /°                                                                                                   | 103.425(3)                          | 100.355 (3)                         |
| $\gamma$ /°                                                                                                  | 90                                  | 90                                  |
| <i>V</i> /Å <sup>3</sup> , <i>Z</i>                                                                          | 2375.1(12), 4                       | 2324.55(11), 4                      |
| <i>F</i> (000)                                                                                               | 928                                 | 928                                 |
| crystal size / mm <sup>3</sup>                                                                               | 0.30×0.10×0.10                      | 0.10×0.10×0.10                      |
| reflections collected /                                                                                      | 14791/7883                          | 18158/7320                          |
| unique ( <i>R</i> <sub>int</sub> )                                                                           | ( <i>R</i> <sub>int</sub> = 0.0332) | ( <i>R</i> <sub>int</sub> = 0.0483) |
| obsd reflns [ <i>I</i> ≥2σ( <i>I</i> )]                                                                      | 6844                                | 6961                                |
| data/restraints/parameter                                                                                    | 7883/1/595                          | 7320/1/595                          |
| <i>D</i> <sub>c</sub> / Mg·m <sup>-3</sup>                                                                   | 1.238                               | 1.265                               |
| $\mu$ / mm <sup>-1</sup>                                                                                     | 1.361                               | 1.390                               |
| goodness-of-fit on <i>F</i> <sup>2</sup>                                                                     | 1.128                               | 1.032                               |
| <i>R</i> <sub>1</sub> , [ <sup>a</sup> ] <i>wR</i> <sub>2</sub> [ <sup>b</sup> ] [ <i>I</i> ≥2σ( <i>I</i> )] | 0.0566, 0.1381                      | 0.0458, 0.1188                      |
| <i>R</i> <sub>1</sub> , <i>wR</i> <sub>2</sub> (all data)                                                    | 0.0660, 0.1437                      | 0.0478, 0.1206                      |

<sup>a</sup>  $R_1 = \frac{\sum ||F_o| - |F_c||}{\sum |F_o|}$ . <sup>b</sup>  $wR_2 = \frac{[\sum [w(F_o^2 - F_c^2)^2]}{\sum w(F_o^2)^2}]^{1/2}$ , where  $w = 1/[(F_o)^2 + (aP)^2 + bP]$  and  $P = (F_o^2 + 2F_c^2)/3$
